# Supplementary material
Source: Elsevier journal article supplement (https://www.sciencedirect.com/science/article/pii/S1695403320304379)
Supplement: mmc2 [file S1695403320304379:mmc2.pdf]

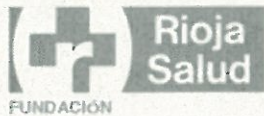

Comité Ético de Investigación Clínica  
de La Rioja (CEImLAR)

El acceso a los datos y documentos de la historia clínica queda limitado estrictamente a los fines específicos de cada caso.

Cuando ello sea necesario para la prevención de un riesgo o peligro grave para la salud de la población, las Administraciones sanitarias a las que se refiere la Ley 33/2011, de 4 de octubre, General de Salud Pública, podrán acceder a los datos identificativos de los pacientes por razones epidemiológicas o de protección de la salud pública. El acceso habrá de realizarse, en todo caso, por un profesional sanitario sujeto al secreto profesional o por otra persona sujeta, asimismo, a una obligación equivalente de secreto, previa motivación por parte de la Administración que solicitase el acceso a los datos."

Específicamente, el solicitante se compromete a:

- Tratar los datos prestados para el estudio (y los medios en los que se le proporcionen) conforme a las instrucciones que le indique el responsable de los mismos del organismo cedente.
- No tratar los datos para ningún fin distinto al que ha expresado en la solicitud.
- No comunicar los datos a otras personas, ni alterarlos, ni perderlos, ni disponer de otros datos a los que tenga acceso que no sean pertinentes para el estudio.
- Consultar los datos proporcionados en el local y con los medios que se le indique.
- Mantener un registro en el que queden identificados los números de Historia Clínica y los informes revisados.
- Garantizar que ninguna otra persona no autorizada accede a los datos cedidos.
- No reproducir ni copiar dichos datos, cuando eso permita identificar a personas físicas.
- Previa a su publicación y difusión, facilitar a la dirección del organismo cedente (Servicio Riojano de Salud, Consejería de Salud, Fundación RiojaSalud, etc) una copia del texto final de la propia investigación, con el fin de evitar que aparezcan datos que permitan identificar personas.
- Guardar secreto profesional respecto de los datos accedidos, dado que el estudio realizado puede dar lugar a tener conocimiento o poder identificar por medios directos o indirectos a algún paciente. El deber de secreto subsistirá aun después de finalizar la relación con el organismo cedente.
- Informar a las personas que colaboren en el estudio sobre las anteriores funciones y obligaciones.

Bajo el compromiso de cumplimiento de estas cláusulas, el organismo cedente AUTORIZA el uso de los datos solicitados en

Logroño, a 09 de Septiembre de 2020

D./Dña. ....

D./Dña . Alicia Caso González

DIRECTOR DE

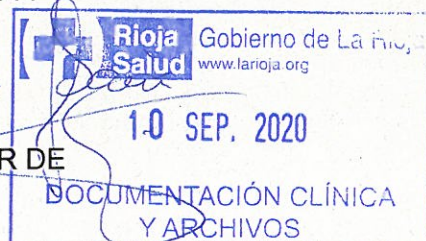

Solicitante
