# Supplementary material
Source: Elsevier journal article supplement (https://www.sciencedirect.com/science/article/pii/S1695403320304379)
Supplement: mmc3 [file S1695403320304379:mmc3.pdf]

Gobierno de La Rioja  
www.larioja.org

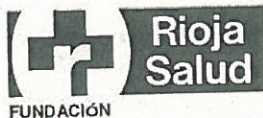

|                              |
|------------------------------|
| <b>Fundación Rioja Salud</b> |
| Entrada N.º.....             |
| <b>- 5 SET. 2019</b>         |
| Salida N.º <u>78</u>         |

Comité de Ética de Investigación con  
medicamentos de La Rioja (CEImLAR)

## DICTAMEN DEL COMITÉ DE ÉTICA DE INVESTIGACIÓN CON MEDICAMENTOS DE LA RIOJA

D<sup>a</sup>. Lara García Álvarez  
Jefa de la Secretaría Técnica Profesional del Comité Ético de Investigación con medicamentos  
de La Rioja

### **CERTIFICA**

Una vez evaluado el Proyecto de Investigación:

Título:

*"Experiencia en la práctica clínica de enfermedades raras metabólicas (ERraMet)" (Ref.  
CEImLAR EPA-OD 99)*

que se va a llevar a cabo en el Servicio de Farmacia Hospitalaria del Hospital San Pedro por  
Alicia Caso González como investigador principal.

El Comité de Ética de Investigación con medicamentos de La Rioja (CEImLAR) **APRUEBA** su  
realización\*.

Lo que firmo en Logroño a 5 de septiembre de 2019

Firmado:

Jefa de la Secretaría Técnica Profesional del CEImLAR

\*Con objeto de cumplir la Ley Orgánica 3/2018, de 5 de diciembre, de Protección de Datos Personales y garantía de los  
derechos digitales, prestando especial atención a la Disposición adicional decimoséptima de Tratamientos de datos de  
salud, este dictamen de aprobación queda condicionado a la evaluación de impacto de protección de datos que se  
realizará en mayor brevedad posible por este Comité.
